# Supplementary material
Source: MDPI journal article supplement (https://www.mdpi.com/2073-8994/14/12/2634)
Supplement: s1 [file s1]

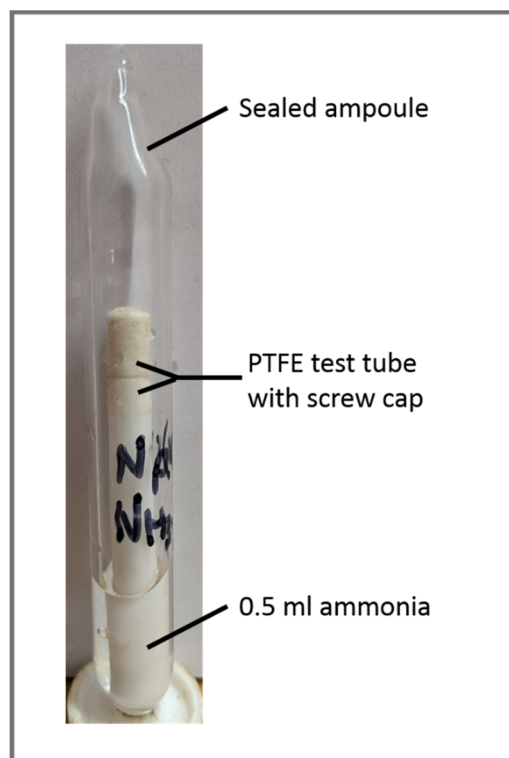

**Figure 1.** Design of the reactor used in the hydrothermal experiment

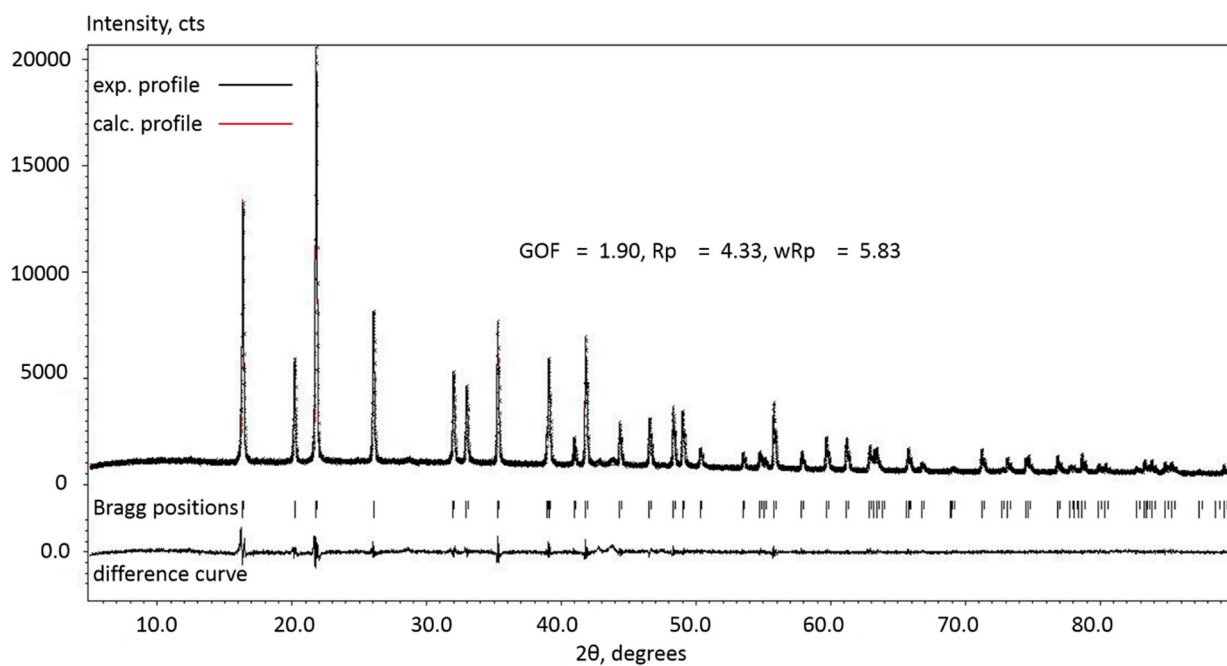

**Figure 2.** Le Bail fit of the PXRD data of the synthesized  $(\text{NH}_4)[\text{NpO}_2\text{CO}_3]$
